# Supplementary material
Source: PubMed Central journal article supplement (PMC4825114)
Supplement: supp_pp.15.01667_PP2015-01667R1_Fig_S1_S2_Table_S2_S3.pdf [file supp_pp.15.01667_PP2015-01667R1_Fig_S1_S2_Table_S2_S3.pdf]

## Supplemental figures

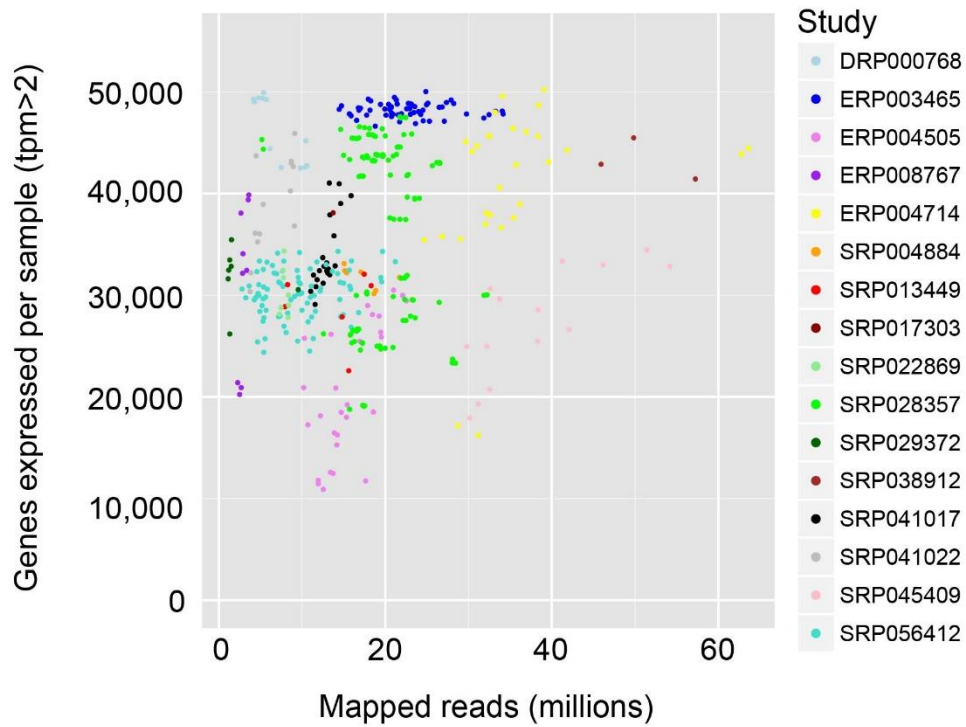

**Figure S1.** Number of genes expressed per sample compared to the number of mapped reads per sample. Samples are colour coded by study.

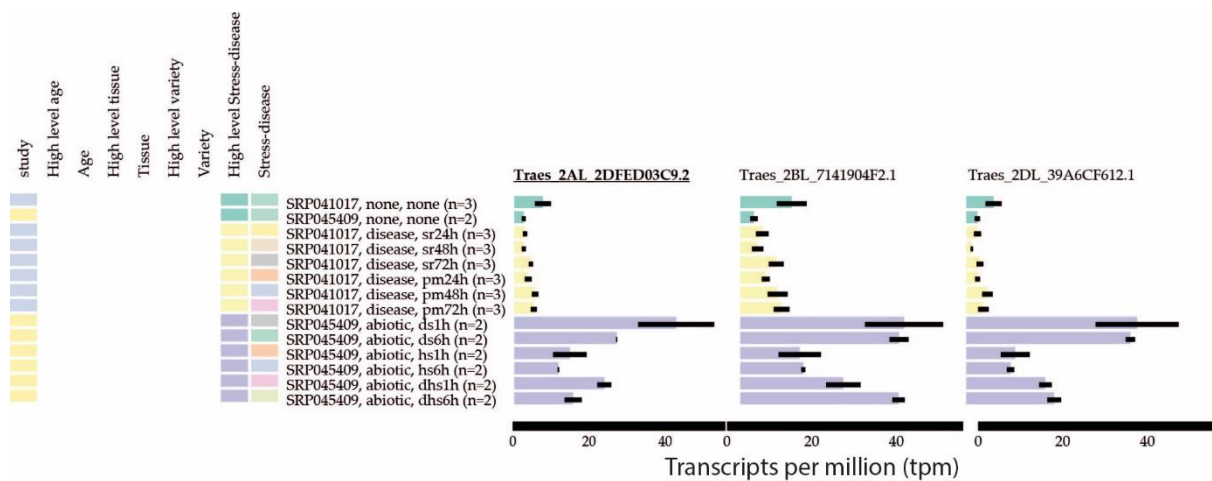

**Figure S2.** Demonstration of data filtering within expVIP interface. The expression of Traes\_2AL\_2DFED03C9.2 is shown only from studies which were used for differential gene expression analysis (SRP041017 for disease and SRP045409 for abiotic stress).

## Supplemental tables

| Tissue | Ensembl transcript ID   | Average expression (tpm) | Function                                                                |
|--------|-------------------------|--------------------------|-------------------------------------------------------------------------|
| grain  | Traes_5BS_FDE980DE1.1   | 5,808                    | Grain softness protein                                                  |
| grain  | TRAES3BF027700070CFD_t1 | 6,898                    | Serine protease inhibitor (annotation of orthologue)                    |
| grain  | Traes_3DS_D718FF51C1.2  | 7,042                    | Alpha-amylase inhibitor 0.19                                            |
| grain  | Traes_1AS_8FAD6A69F.1   | 9,155                    | unknown                                                                 |
| grain  | Traes_1DS_67B7153A8.1   | 10,350                   | Glutenin (annotation of orthologue)                                     |
| grain  | Traes_1DS_66B67E9B41.2  | 20,423                   | Glutenin (annotation of orthologue)                                     |
| grain  | Traes_4AL_661613B77.1   | 63,949                   | Alpha/beta-gliadin MM1                                                  |
| grain  | Traes_4AL_4FF5B8837.1   | 70,002                   | Alpha/beta-gliadin A-I                                                  |
| grain  | Traes_5BL_E68C461B3.1   | 77,505                   | Alpha/beta-gliadin (annotation of orthologue)                           |
| grain  | Traes_1DL_D861501F5.1   | 96,186                   | Glutenin, high molecular weight subunit 12                              |
| leaf   | Traes_4DL_7CF374FEE.1   | 4,518                    | Ribulose biphosphate carboxylase large chain (annotation of orthologue) |
| leaf   | Traes_3DS_4EF0DAA39.1   | 4,794                    | Photosystem I reaction center subunit XI (annotation of orthologue)     |
| leaf   | Traes_3DL_B80EC2366.1   | 6,041                    | putative nontranslating CDS                                             |
| leaf   | TRAES3BF032400040CFD_t1 | 6,402                    | unknown                                                                 |
| leaf   | Traes_4DL_85C90C56C.2   | 7,058                    | Ribulose biphosphate carboxylase large chain                            |
| leaf   | TRAES3BF011000020CFD_t1 | 7,785                    | Histidine kinase 3 (annotation of orthologue)                           |
| leaf   | Traes_6BL_5979B5341.1   | 10,819                   | unknown                                                                 |
| leaf   | TRAES3BF007300450CFD_t1 | 12,421                   | unknown                                                                 |
| leaf   | TRAES3BF007300320CFD_t1 | 21,923                   | unknown                                                                 |
| leaf   | Traes_7DS_037CD9FCA.1   | 23,120                   | unknown                                                                 |

**Table S2.** Ten most highly expressed genes in wheat grain and leaf tissues from seven and nine independent studies, respectively.

|                   |                                                                                | Shoots           |        |        |        |        |        |        |         | Roots  |        |        |        |        |        |       |  |
|-------------------|--------------------------------------------------------------------------------|------------------|--------|--------|--------|--------|--------|--------|---------|--------|--------|--------|--------|--------|--------|-------|--|
|                   |                                                                                | euploid          | N1AT1B | N1AT1D | N1BT1A | N1BT1D | N1DT1A | N1DT1B | euploid | N1AT1B | N1AT1D | N1BT1A | N1BT1D | N1DT1A | N1DT1B |       |  |
| kallisto          | Average gene expression level in shoots for genes located on chromosome (tpm): | 1A               | 16.5   | 3.0    | 3.6    | 42.0   | 19.5   | 32.6   | 22.6    | 20.7   | 3.6    | 4.7    | 42.9   | 24.0   | 38.8   | 22.0  |  |
|                   |                                                                                | 1B               | 14.0   | 31.3   | 16.8   | 3.0    | 3.2    | 16.6   | 32.0    | 20.0   | 40.2   | 20.9   | 2.4    | 3.2    | 20.4   | 39.4  |  |
|                   |                                                                                | 1D               | 14.7   | 17.2   | 29.7   | 18.7   | 29.1   | 3.1    | 3.4     | 21.3   | 23.9   | 39.3   | 25.5   | 45.7   | 3.4    | 4.1   |  |
|                   |                                                                                | 1A+<br>1B+<br>1D |        |        |        |        |        |        |         |        |        |        |        |        |        |       |  |
|                   | Percentage of gene expression originating from:                                | 1A               | 36.6%  | 5.8%   | 7.3%   | 66.0%  | 37.6%  | 62.4%  | 39.0%   | 33.4%  | 5.3%   | 7.2%   | 60.5%  | 32.9%  | 62.0%  | 33.6% |  |
|                   |                                                                                | 1B               | 30.9%  | 60.7%  | 33.5%  | 4.7%   | 6.3%   | 31.7%  | 55.2%   | 32.3%  | 59.3%  | 32.2%  | 3.4%   | 4.4%   | 32.6%  | 60.2% |  |
|                   |                                                                                | 1D               | 32.5%  | 33.5%  | 59.3%  | 29.3%  | 56.1%  | 5.9%   | 5.8%    | 34.4%  | 35.4%  | 60.6%  | 36.0%  | 62.7%  | 5.4%   | 6.2%  |  |
| bowtie2 + eXpress | Average gene expression level in shoots for genes located on chromosome (tpm): | 1A               | 9.1    | 2.2    | 2.4    | 20.5   | 11.0   | 16.8   | 11.5    | 13.5   | 2.7    | 3.4    | 26.3   | 14.9   | 24.0   | 13.9  |  |
|                   |                                                                                | 1B               | 7.4    | 15.3   | 8.2    | 1.8    | 2.0    | 8.6    | 15.8    | 13.0   | 24.7   | 13.2   | 2.4    | 2.6    | 12.9   | 24.6  |  |
|                   |                                                                                | 1D               | 7.6    | 8.6    | 14.8   | 8.9    | 14.7   | 1.9    | 1.9     | 13.8   | 15.2   | 24.3   | 16.0   | 28.1   | 2.7    | 3.2   |  |
|                   |                                                                                | 1A+<br>1B+<br>1D |        |        |        |        |        |        |         |        |        |        |        |        |        |       |  |
|                   | Percentage of gene expression originating from:                                | 1A               | 37.8%  | 8.5%   | 9.4%   | 65.7%  | 39.6%  | 61.5%  | 39.4%   | 33.6%  | 6.4%   | 8.3%   | 58.8%  | 32.6%  | 60.6%  | 33.4% |  |
|                   |                                                                                | 1B               | 30.7%  | 58.5%  | 32.3%  | 5.8%   | 7.2%   | 31.5%  | 54.1%   | 32.2%  | 58.0%  | 32.3%  | 5.3%   | 5.7%   | 32.7%  | 58.9% |  |
|                   |                                                                                | 1D               | 31.5%  | 33.0%  | 58.3%  | 28.5%  | 53.2%  | 7.0%   | 6.5%    | 34.2%  | 35.7%  | 59.5%  | 35.8%  | 61.7%  | 6.7%   | 7.7%  |  |

**Table S3.** Comparison of accuracy for two methods of read alignment and quantification. Reads from nullitetrasonic wheat lines were aligned and quantified using the pseudo aligner and quantifier kallisto (upper part of table) or the conventional aligner bowtie2 combined with eXpress for quantification (lower part of table). Gene expression on chromosome group 1 (the chromosome group for which whole chromosomes were added or deleted in these lines) was compared to assess accuracy of alignment and quantification.
